# Supplementary material
Source: HighWire-hosted journal article supplement (http://www.jrheum.org/highwire/filestream/31584/field_highwire_adjunct_files/0/161404DataSuppl.pdf)
Supplement: 161404DataSuppl.pdf [file 161404DataSuppl.pdf]

## ONLINE SUPPLEMENTARY DATA

Supplementary Figure 1. Patient selection flow.

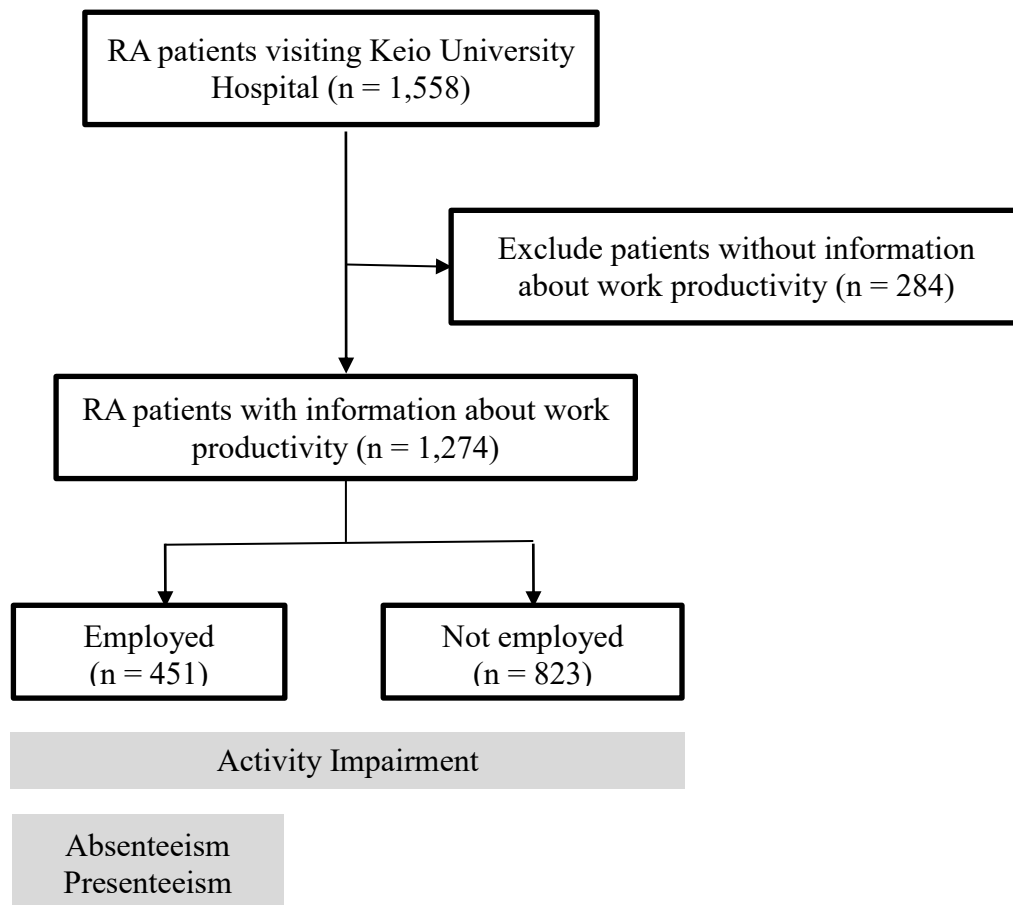

**Supplementary Table 1.** Benefit of remission over low disease activity, defined by DAS28, SDAI and CDAI, on work and activity impairment in RA patients.

| Composite disease activity score | Total patients (n=1274) |       | Employed patients (n=451) |      |                       |      |
|----------------------------------|-------------------------|-------|---------------------------|------|-----------------------|------|
|                                  | Activity impairment     |       | Absenteeism               |      | Presenteeism          |      |
|                                  | Estimate (95% CI)       | p     | Estimate (95% CI)         | p    | Estimate (95% CI)     | p    |
| <b>DAS28</b>                     |                         |       |                           |      |                       |      |
| Remission vs. LDA                | -3.95 (-6.67, -1.22)    | <0.01 | -1.63 (-3.69, 0.43)       | 0.12 | -5.63 (-10.02, -1.24) | 0.01 |
| <b>SDAI</b>                      |                         |       |                           |      |                       |      |
| Remission vs. LDA                | -3.00 (-5.88, -0.12)    | 0.04  | -0.18 (-2.61, 2.25)       | 0.88 | -3.13 (-7.85, 1.58)   | 0.19 |
| <b>CDAI</b>                      |                         |       |                           |      |                       |      |
| Remission vs. LDA                | -4.20 (-7.10, -1.30)    | <0.01 | -0.54 (-2.92, 1.84)       | 0.66 | -4.41 (-8.99, 0.17)   | 0.06 |

Adjusted for propensity score including age, sex, RA disease duration, comorbidity positivity, pain VAS, EQ5D and use of methotrexate, other csDMARDs, biologic agents, and oral corticosteroid.

DAS28, disease activity index-28 joints; SDAI, simple disease activity index; CDAI, clinical disease activity index; CI, confidence interval; LDA, low disease activity; VAS, visual analogue scale; EQ5D, EuroQol-5 dimension; csDMARDs, conventional synthetic disease modifying anti-rheumatic drugs.
